# Supplementary material
Source: PubMed Central journal article supplement (PMC3725202)
Supplement: NIHMS483558-supplement-1.pdf [file NIHMS483558-supplement-1.pdf]

## Supplementary information

**Supplemental Table 1. Lever presses (Mean  $\pm$  SEM) during the 5-min reactivation session in the operant chambers.** Vehicle, rapamycin or anisomycin was administered immediately after the reactivation session. Differences are not significant,  $p$ 's>0.05.

| <b>Experiment</b>                    |                              | <b>Vehicle</b>   | <b>Rapamycin/anisomycin</b> |
|--------------------------------------|------------------------------|------------------|-----------------------------|
| <b>Systemic rapamycin (20 mg/kg)</b> | Immunohistochemistry         | 19.00 $\pm$ 5.53 | -                           |
|                                      | Western blot I               | 22.25 $\pm$ 5.68 | -                           |
|                                      | Western blot II              | 19.50 $\pm$ 3.29 | 20.75 $\pm$ 2.30            |
|                                      | Test/reacquisition           | 18.00 $\pm$ 2.71 | 16.42 $\pm$ 3.07            |
|                                      | Sucrose                      | 8.07 $\pm$ 2.30  | 10.71 $\pm$ 2.13            |
| <b>Intra-CeA</b>                     | Rapamycin (50 $\mu$ g/side)  | 18.13 $\pm$ 3.46 | 20.38 $\pm$ 4.01            |
|                                      | Anisomycin (50 $\mu$ g/side) | 19.33 $\pm$ 2.88 | 17.29 $\pm$ 3.54            |

**Barak et al., Supplemental Fig. 1**

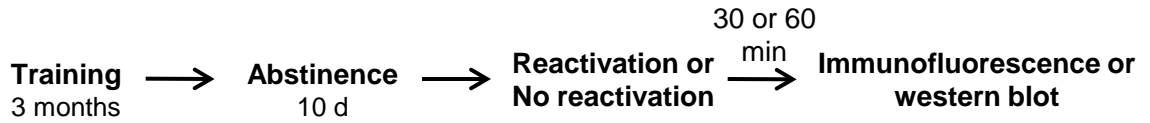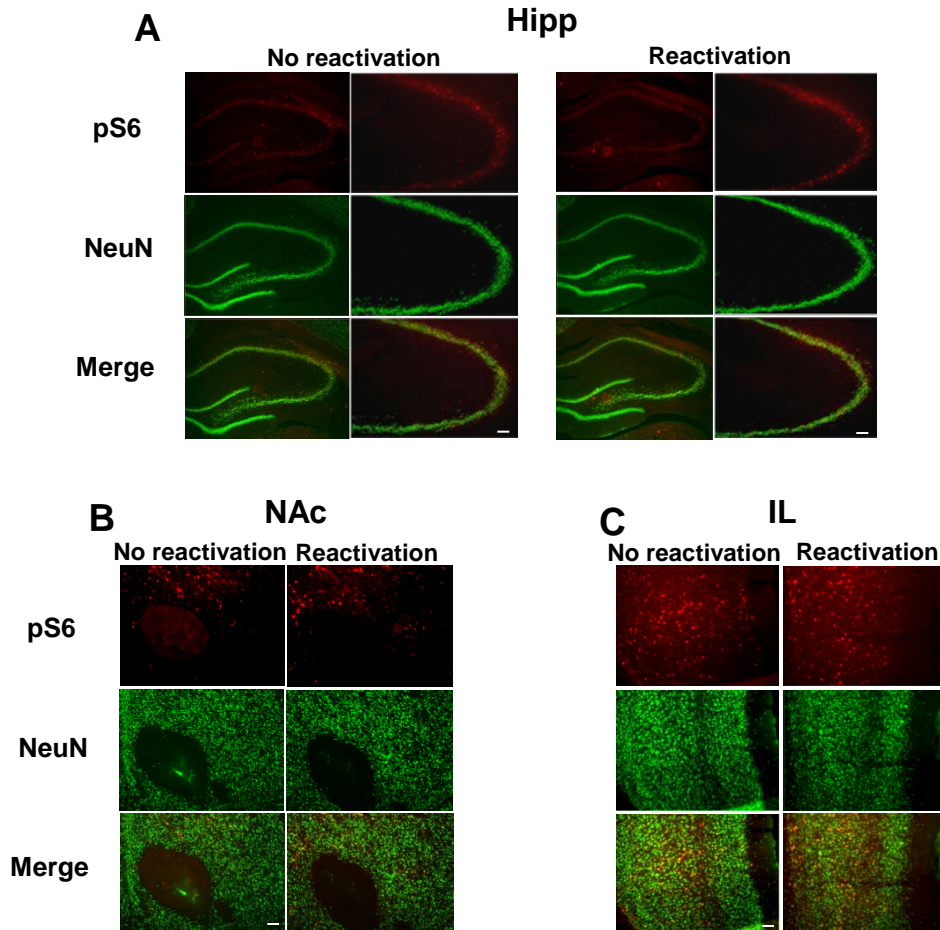

**Supplemental Figure 1. The mTORC1 signaling pathway is not activated in the hippocampus, nucleus accumbens and infralimbic cortex following reactivation of alcohol-associated memories. A-C. Immunohistochemical staining of S6 phosphorylation. A-C.** Shown is dual-channel immunofluorescence images of phosphoS6 (pS6, red), NeuN (a marker for neurons, green), and overlay (yellow), the dorsal hippocampus (A); the nucleus accumbens (NAc; B); and the infralimbic region of the medial prefrontal cortex (IL; C). Images are representative of results from 4 rats (3-4 sections/region/rat). Scale bar: 100  $\mu\text{m}$ .

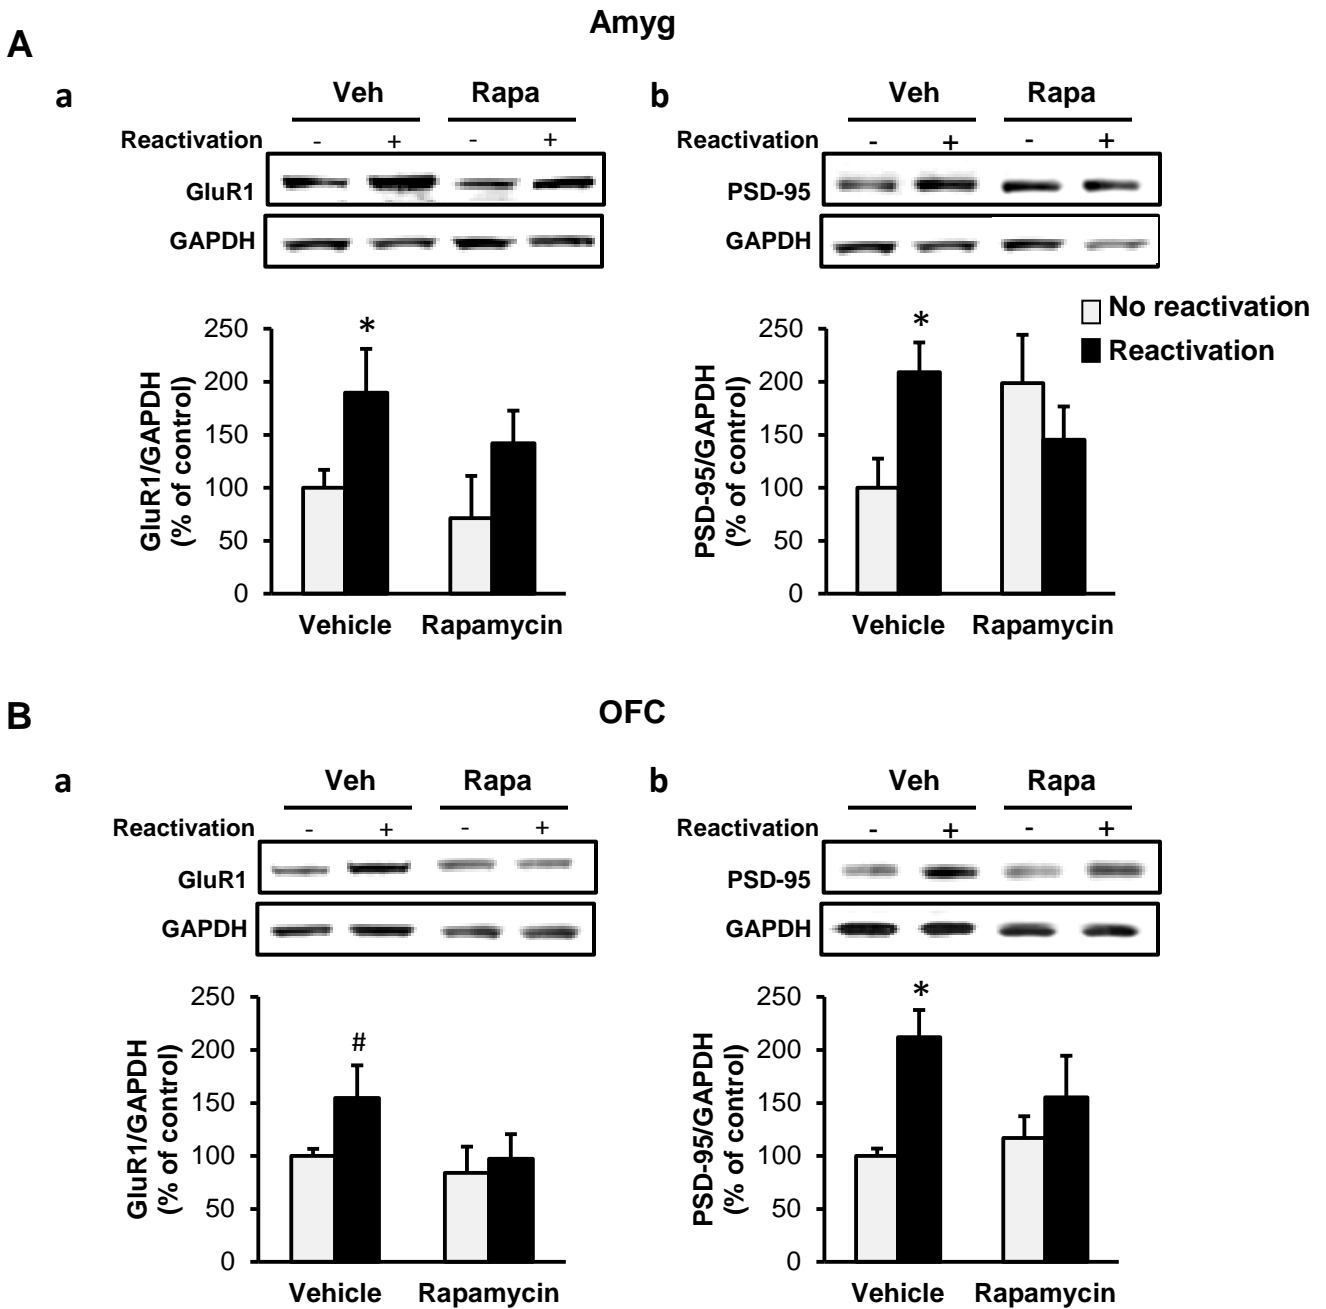

**Supplemental Figure 2. Reactivation of alcohol-associated memories increases levels of synaptic proteins.** Immunoblotting of GluR1 (Aa, Ba) and PSD-95 (Ab, Bb) in the amygdala (Amyg; A) and OFC (B), 60 min after reactivation of alcohol-associated memory. The levels of GluR1 and PSD-95 determined by western blot analysis and normalized to GAPDH. Rapamycin (20 mg/kg, i.p) was administered immediately after memory reactivation. Data are mean  $\pm$  SEM and expressed as percentage of control. Aa, Ba, Bb, Two-way ANOVA; non-significant Reactivation X Treatment interaction; Ab, Reactivation X Treatment interaction [F(1, 11)=4.54, p=0.05] post hoc comparisons \*p<0.05 #p=0.07; n=3-4 per group).

**Barak et al., Supplemental Fig. 3**

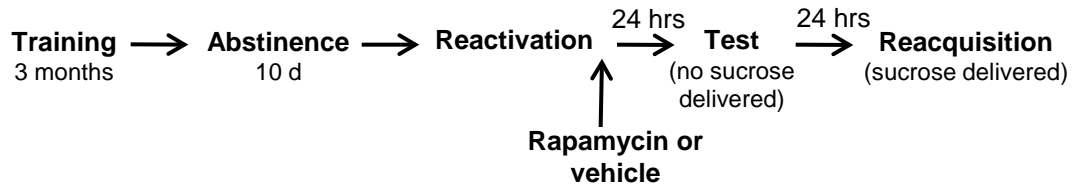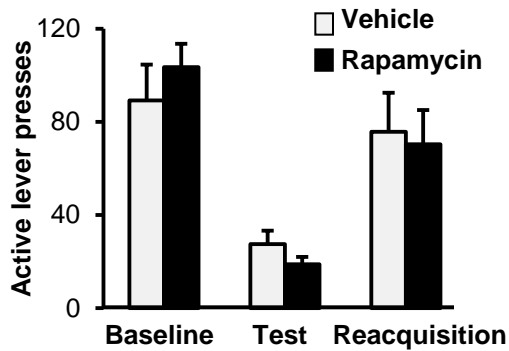

**Supplemental Figure 3. Inhibition of mTORC1 after reactivation of sucrose-associated memories does not affect relapse measured as instrumental responding for sucrose.** Effects of rapamycin (20 mg/kg ,i.p.) given immediately after memory reactivation using presentation of context as well as a sucrose solution prime, on lever presses during test and reacquisition. Data are mean  $\pm$  SEM of active lever presses before abstinence (baseline), and during retention test and reacquisition stages. (Two-way ANOVA; Stage X Treatment interaction [ $F(2,26)=1.65$ ,  $p=0.21$ ],  $n=14$ ).

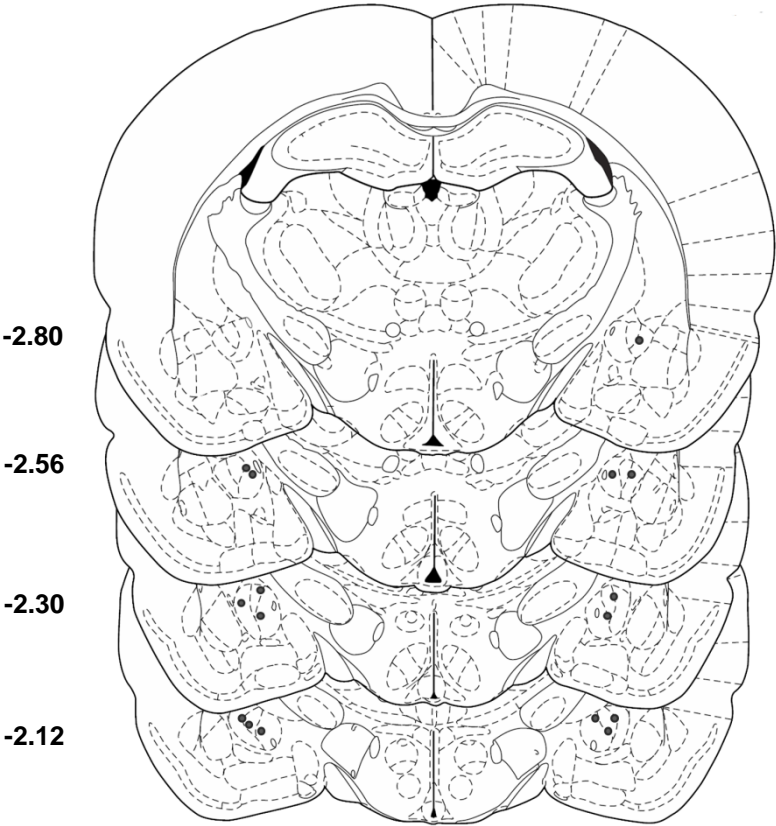

**Supplementary Figure 4. Schematic representation of the cannulae placement** in the central nucleus of the amygdala in coronal sections<sup>3</sup>. The locations of the cannulae tips are represented by black circles. Numbers indicate the distance relative to Bregma, in mm.

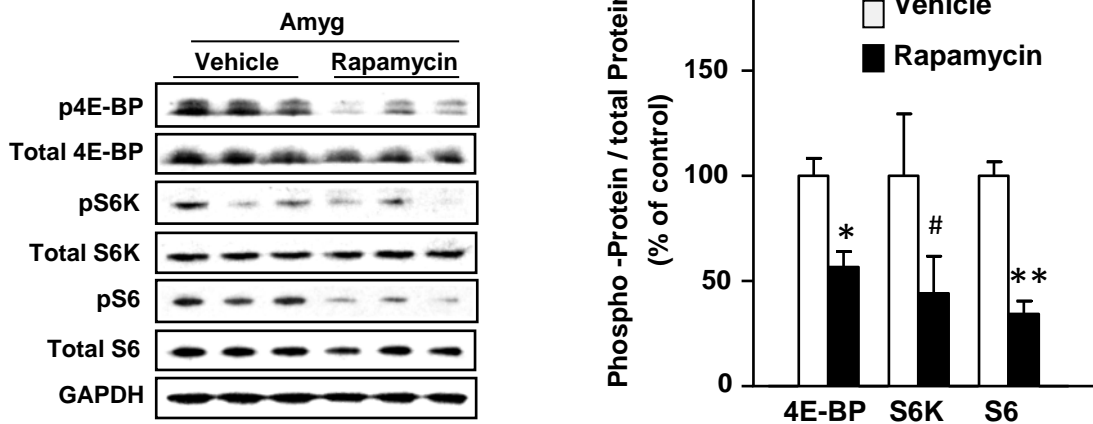

**Figure 5. Infusion of rapamycin into the central nucleus of the amygdala (CeA) locally inhibits mTORC1 signaling.** Rapamycin (50  $\mu\text{g}/\text{side}$ ) was infused unilaterally into rats' CeA; the other side was infused with vehicle. Three hrs later, Immunoreactivity of 4E-BP, S6K and S6 phosphorylation was determined by western blot analysis, normalized to the total protein level. Data are expressed as percentage of vehicle. ( $t(4) > 2.65$ ,  $\#p = 0.06$ ;  $*p < 0.05$ ,  $**p < 0.01$ ,  $n = 3$ ).

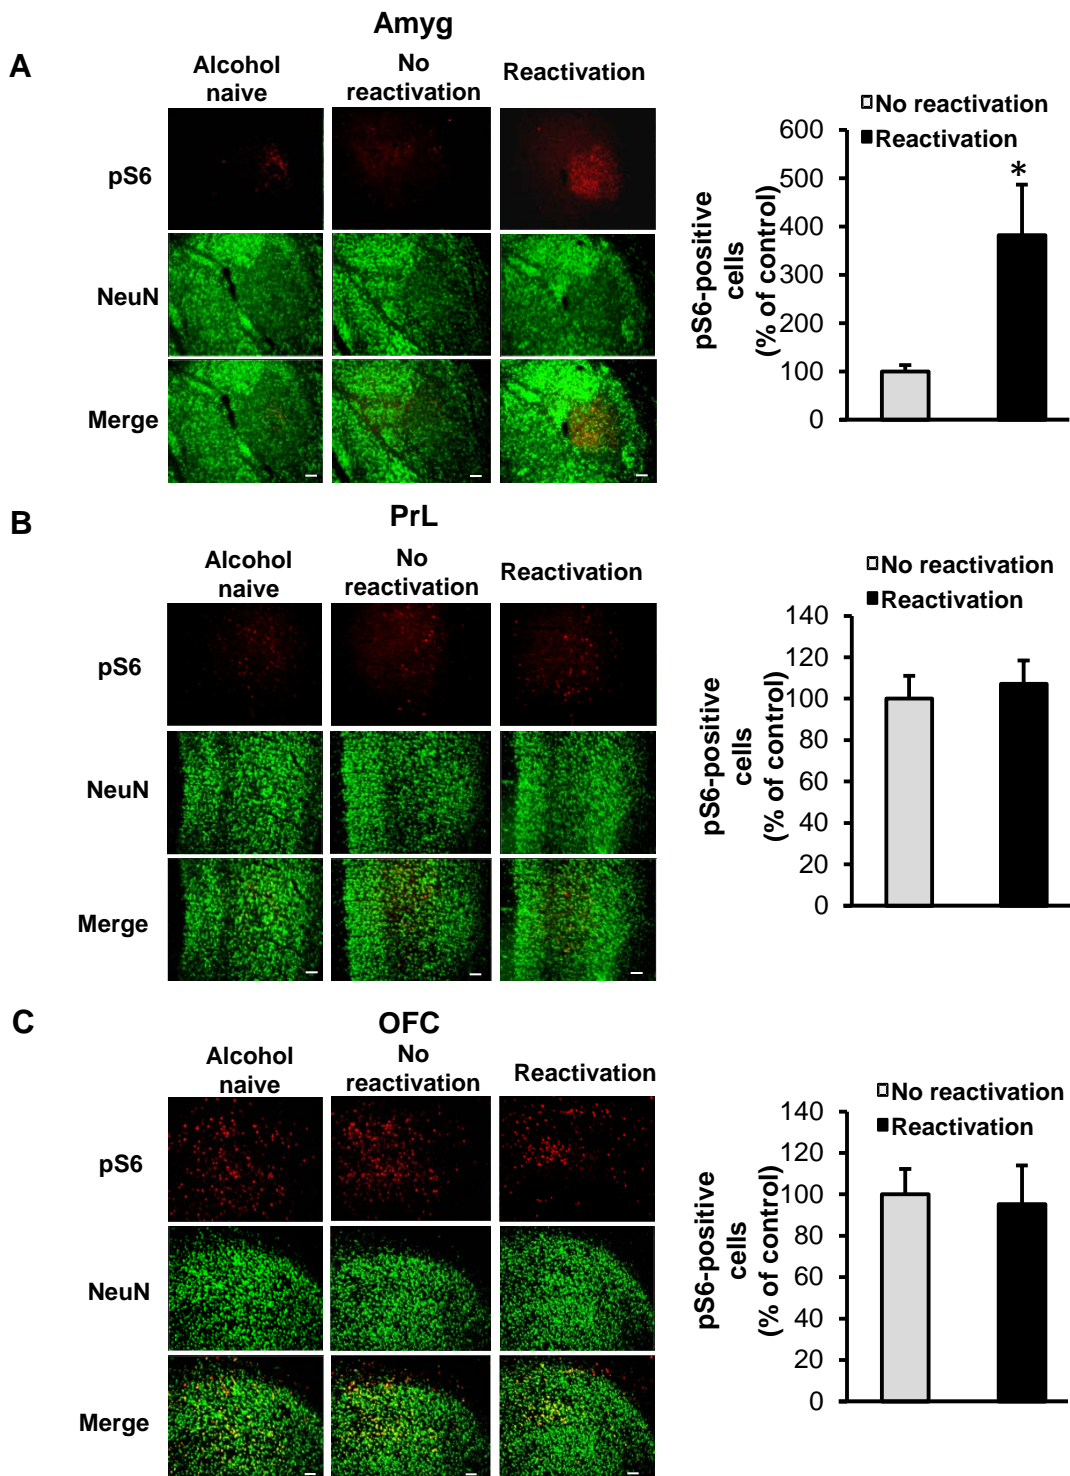

**Supplemental Figure 6. The mTORC1 signaling pathway is activated in the CeA but not in the PrL or OFC following reactivation with of alcohol-associated memories odor-taste cue. A-C.** Shown is dual-channel immunofluorescence images of phosphoS6 (pS6, red), NeuN (a marker for neurons, green), and overlay (yellow), the CeA (A), the PrL (B) and the OFC (C) of alcohol-naïve and alcohol-experienced rats that underwent memory reactivation by a brief exposure to the odor-taste of alcohol in the home cage (alcohol-naïve and reactivation, respectively), and of alcohol-experienced control rats that did not have a memory reactivation session (no reactivation). Images are representative of results from 4 rats (3-4 sections/region/rat). Scale bar, 100  $\mu$ m. Quantification of the immunohistochemical staining was conducted by blind counting of pS6-positive cells normalized by the total area, in 3 slices per brain region from each rat. Data are mean  $\pm$  SEM ( $t(6) > 2.67$ ; \* $p < 0.05$ ,  $n = 4$ ).

**Barak et al., Supplemental Fig. 7**

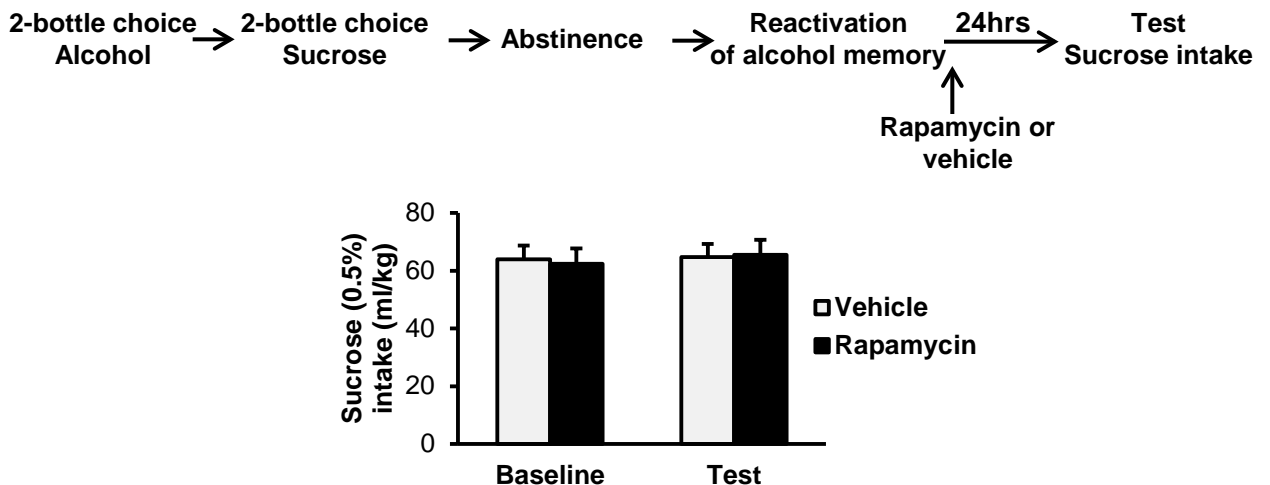

**Supplemental Figure 7. Inhibition of mTORC1 after reactivation of alcohol-associated memories does not affect non-reactivated memories.** Effects of rapamycin given after reactivation of alcohol-associated memories on reinstatement of sucrose intake in a 2-bottle choice procedure. Data are presented as mean  $\pm$  SEM of sucrose (0.5% solution) intake (ml/kg/24 hrs) during a 24 hrs 2-bottle choice session, in rapamycin- or vehicle-treated rats before abstinence (baseline) and 24 hrs after reactivation (test; two-way ANOVA; no significant Stage X Treatment interaction  $F(1,14)=0.63$ ,  $p=0.84$ ;  $n=8$ ).
